1 **Deletion of *EP4* in *S100a4*-lineage cells reduces scar tissue formation during early but not later stages of**  
2 **tendon healing**

3

4 Jessica E. Ackerman<sup>1</sup>, Katherine T. Best<sup>1</sup>, Regis J. O'Keefe<sup>2</sup>, Alayna E. Loiseau<sup>1,\*</sup>

5

6 <sup>1</sup>Center for Musculoskeletal Research, University of Rochester, Rochester, New York, United States of  
7 America

8 <sup>2</sup>Department of Orthopedic Surgery, Washington University School of Medicine, St. Louis, Missouri, United  
9 States of America

.0

.1 \*Corresponding Author

.2 Email: [Alayna.Loiseau@urmc.rochester.edu](mailto:Alayna.Loiseau@urmc.rochester.edu)

.3

## Abstract

Tendon injuries heal via scar tissue rather than regeneration. This healing response forms adhesions between the flexor tendons in the hand and surrounding tissues, resulting in impaired range of motion and hand function. Mechanistically, inflammation has been strongly linked to adhesion formation, and Prostaglandin E2 (PGE2) is associated with both adhesion formation and tendinopathy. In the present study we tested the hypothesis that deletion of the PGE2 receptor *EP4* in *S100a4*-lineage cells would decrease adhesion formation. *S100a4*-Cre; *EP4*<sup>flox/flox</sup> (*EP4cKO*<sup>*S100a4*</sup>) repairs healed with improved gliding function at day 14, followed by impaired gliding at day 28, relative to wild type. Interestingly, *EP4cKO*<sup>*S100a4*</sup> resulted in only transient deletion of *EP4*, suggesting up-regulation of *EP4* in an alternative cell population in these mice. Loss of *EP4* in *Scleraxis*-lineage cells did not alter gliding function, suggesting that *Scx*-lineage cells are not the predominant *EP4* expressing population. In contrast, a dramatic increase in  $\alpha$ -SMA<sup>+</sup> and  $\alpha$ -SMA<sup>+</sup>, *EP4*<sup>+</sup> cells were observed in *EP4cKO*<sup>*S100a4*</sup> suggesting that *EP4cKO*<sup>*S100a4*</sup> repairs heal with increased infiltration of *EP4* expressing  $\alpha$ -SMA myofibroblasts, identifying a potential mechanism of late up-regulation of *EP4* and impaired gliding function in *EP4cKO*<sup>*S100a4*</sup> tendon repairs.

## Introduction

Tendons are dense connective tissues composed primarily of a highly organized type I collagen extracellular matrix (ECM). The hierarchical structure of the collagen ECM allows tendons to transmit large forces between muscle and bone, facilitating movement of nearly the entire body. Acute traumatic injuries to the tendon are quite common due in part to the superficial anatomic location of many tendons. Following injury, tendons generally heal with a scar tissue response rather than regeneration of native tendon. This fibrotic healing response is particularly problematic in the hands, as excursion of the flexor tendons within the synovial sheath is restricted by both increased tissue bulk and the formation of adhesions between the tendon and surrounding tissues. Currently, treatment to restore digit range of motion (ROM) after injury is limited to surgical ‘tenolysis’ procedures (1), however this intervention provides only a temporary return to function. Thus, a better understanding of the fundamental cellular and molecular components of fibrotic healing are needed in order to inform development of future therapeutic interventions to improve tendon healing.

Tendon healing is composed of three over-lapping phases of healing including inflammation, proliferative/ matrix deposition, and the remodeling phase. Several studies have demonstrated that anti-inflammatory treatment, particularly Cox-2 inhibition, effectively reduces adhesion formation (2, 3), however, mechanical properties can also be compromised with this approach (2). Therefore, recent studies have focused on downstream signaling of Cox-2 as potential therapeutic targets. Cox-2 catalyzes the conversion of Arachidonic Acid to Prostaglandins, including PGE<sub>2</sub>, which is associated with tendinopathy and involved in tendon repair (4-8). Moreover, EP4 has been identified as the specific receptor through which degenerative tendinopathic changes of PGE<sub>2</sub> are mediated (9). We have previously demonstrated that systemic EP4 antagonism increased adhesion formation, relative to vehicle treated repairs (10), however the specific function of EP4 is dependent on cell type (11, 12). Therefore, in the present study we have focused on the effects of cell-type specific EP4 deletion on tendon healing.

In the present study we utilized *S100a4*-Cre; *EP4*<sup>flox/flox</sup> (*EP4cKO*<sup>S100a4</sup>) mice to test the hypothesis that conditional deletion of *EP4* in *S100a4*-lineage cells would reduce adhesion formation while maintaining mechanical properties, relative to wildtype (WT) littermates. We show that flexor tendon repairs from

EP4cKO<sup>S100a4</sup> have only a transient, early inhibition of *EP4* expression, concomitant with early reductions in adhesion formation. However, during later healing *EP4* expression is increased in EP4cKO<sup>S100a4</sup> repairs relative to WT, suggesting an alternative cell population up-regulates *EP4* in these mice. We then show that loss of *EP4* in *Scleraxis*-lineage cells does not alter adhesion formation, while EP4cKO<sup>S100a4</sup> repairs have an increase in the myofibroblast marker  $\alpha$ -SMA, suggesting a potential mechanism of increased adhesion formation that occurs during later healing in EP4cKO<sup>S100a4</sup> mice.

## Results

### *S100a4*-lineage cells are found in both native tendon and the granulation tissue

To determine the expression pattern of *S100a4*-lineage cells using *S100a4*-Cre, and thus the potential localization of *EP4* conditional deletion, the *ROSA*<sup>nT/nG</sup> dual reporter was used. GFP-expressing (*S100a4*-Cre<sup>+</sup>) cells were observed in approximately half of resident tenocytes in the absence of injury (Fig. 1A). At day 7 post-surgery abundant GFP<sup>+</sup>, *S100a4*-Cre<sup>+</sup> cells were observed throughout the native tendon and within the highly cellular bridging granulation tissue (Fig. 1B & B'). At day 14 post-repair a few GFP<sup>+</sup>, *S100a4*-Cre<sup>+</sup> cells were observed in the ends of the native tendon, however, abundant GFP<sup>+</sup>, *S100a4*-Cre<sup>+</sup> cells were present in the granulation tissue that bridges the injury site (Fig. 1C & 1C').

### *EP4cKO*<sup>S100a4</sup> Does not alter mechanical properties of un-injured tendons

To ensure that EP4cKO<sup>S100a4</sup> did not impair baseline mechanical properties and gliding function of the FDL, un-injured contralateral control tissues were used. No change in Max load at failure (WT: 7.33N  $\pm$  0.35; EP4cKO<sup>S100a4</sup>: 7.89  $\pm$  0.67 p=0.46) (Fig. 2A), stiffness or energy to Max (data not shown) were observed between EP4cKO<sup>S100a4</sup> and WT tendons. Additionally, no change in MTP flexion angle (WT: 51.98  $\pm$  1.75; EP4cKO<sup>S100a4</sup>: 51.78  $\pm$  3.95, p=0.96) (Fig. 2B) and Gliding Resistance (WT: 9.63  $\pm$  0.95; EP4cKO<sup>S100a4</sup>: 11.09  $\pm$  2.11, p=0.53) were observed between genotypes (Fig. 2C).

### *EP4* expression is decreased during early but not late healing in EP4cKO<sup>S100a4</sup> tendon repairs

To determine the temporal effects of EP4cKO<sup>S100a4</sup> on *EP4* expression during healing, mRNA was isolated from WT and EP4cKO<sup>S100a4</sup> repairs between 7 and 28 days post-repair. Peak *EP4* expression was observed in WT repairs at day 7 post-repair, consistent with previous studies (10), followed by a significant reduction in *EP4* expression at 14, 21 and 28 days, relative to day 7. A significant 63.9% reduction in *EP4* expression was observed in EP4cKO<sup>S100a4</sup> repairs relative to WT ( $p=0.0135$ , Fig. 3) at day 7, identifying efficient reduction in *EP4* expression at this time. In contrast, *EP4* expression was significantly increased in EP4cKO<sup>S100a4</sup> repairs at days 14 and 21, relative to time-point matched WT repairs. No change in *EP4* expression was observed between WT and EP4cKO<sup>S100a4</sup> repairs at day 28 (Fig. 3)

#### *EP4cKO<sup>S100a4</sup> flexor tendon repairs have an early, transient improvement in gliding function*

No differences in MTP flexion angle were observed at day 10 post-repair between WT and EP4cKO<sup>S100a4</sup> mice. However, by day 14 a significant 71% increase in MTP Flexion angle was observed in EP4cKO<sup>S100a4</sup> (WT:  $14.53 \pm 1.74$ ; EP4cKO<sup>S100a4</sup>:  $28.55 \pm 5.44$ ,  $p=0.03$ ). At 21 days MTP flexion was not different between genotypes, however, at 28 days MTP Flexion was significantly increased in WT relative to EP4cKO<sup>S100a4</sup> ( $p=0.03$ ) (Fig. 4A). A significant increase in Gliding Resistance occurred in WT repairs at day 14, relative to EP4cKO<sup>S100a4</sup> (WT:  $65.00 \pm 8.06$ ; EP4cKO<sup>S100a4</sup>:  $37.60 \pm 7.887$   $p=0.034$ ) (Fig. 4B). No changes in Gliding Resistance were observed between groups at any other time-points.

#### *EP4cKO<sup>S100a4</sup> does not impair mechanical properties during flexor tendon healing*

Max load at failure improved progressively in both WT and EP4cKO<sup>S100a4</sup> repairs from day 14 to day 28. While no differences were observed in max load at failure between genotypes at a given time point, accrual of strength was slightly retarded in EP4cKO<sup>S100a4</sup> repairs, and there was a trend toward decreased max load at failure in EP4cKO<sup>S100a4</sup>, relative to WT at Day 28 ( $p=0.068$ ). The max load at failure improved 328% in WT repairs from day 14 to Day 28 (Day 14:  $0.83 \pm 0.09$ ; Day 28:  $3.57 \pm 0.62$ ). In contrast, EP4cKO<sup>S100a4</sup> repairs regained only 176% of max load at failure from day 14 to day 28 (Day 14:  $0.78 \pm 0.14$ ; Day 28:  $2.164 \pm 0.31$ ) (Fig. 4C). No differences in stiffness occurred between WT and EP4cKO<sup>S100a4</sup> repairs at any time, however, there was a trend

toward an increase in stiffness in WT, relative to EP4cKO<sup>S100a4</sup> at day 28 (WT:  $0.739 \pm 0.07$ ; EP4cKO<sup>S100a4</sup>:  $0.399 \pm 0.16$ ,  $p=0.076$ )(Fig. 4D).

### *EP4cKO<sup>S100a4</sup> Repairs Heal with Decreased Expression of Coll1a1 and Col3a1*

No change in *Coll1a1* expression was observed between groups at day 7 post-surgery, and the typical progressive increase in *Coll1a1* was observed in WT repairs between 7-21 days, followed by a return to baseline levels by day 28. In contrast, *Coll1a1* was significantly decreased in EP4cKO<sup>S100a4</sup> repairs at day 14 post-surgery relative to WT (WT:  $7.3 \pm 3.34$ ; EP4cKO<sup>S100a4</sup>:  $0.76 \pm 0.22$ ,  $p=0.03$ ), followed by a non-significant decrease at day 21 (WT:  $10.36 \pm 5.11$ ; EP4cKO<sup>S100a4</sup>:  $5.20 \pm 1.52$ ,  $p=0.1$ ) (Figure 5A). Additionally, *Col3a1* increased transiently in WT repairs from day 7-14, followed by a gradual decline back to baseline levels by day 28. *Col3a1* expression was significantly decreased in EP4cKO<sup>S100a4</sup> repairs at day 14 relative to WT (WT:  $5.8 \pm 1.27$ ; EP4cKO<sup>S100a4</sup>:  $1.37 \pm 0.94$ ,  $p=0.04$ ). No changes in *Col3a1* expression were observed between groups at 21 or 28 days post-surgery (Figure 5B). These data resulted in an elevated *Coll1a1/Col3a1* ratio at 7 and 21 days post-surgery in WT repairs relative to EP4cKO<sup>S100a4</sup>.

### *Loss of EP4 in Scleraxis-lineage cells does not alter flexor tendon healing*

The substantial increase in *EP4* expression in EP4cKO<sup>S100a4</sup> repairs suggests a cell population separate from *S100a4*-lineage expresses *EP4* during the later stages of healing. As a potential alternative population of *EP4* expressing cells, we examined the effects of *EP4* deletion in *Scleraxis*-lineage cells.

Tracing of *Scx*-lineage cells identifies labels almost all resident tenocytes in the un-injured flexor tendon (green cells, Fig. 6A). Following injury there is an expansion of the *Scx*-lineage cells, with localization in both the native tendon and reactive epitenon, with very few *Scx*-lineage cells in the bridging scar tissue (Fig. 6B).

At day 14 post-repair no change in MTP flexion angle was observed between WT and EP4cKO<sup>Scx</sup> ( $p=0.83$ , Fig.6C). Consistent with this, no change in Gliding Resistance was observed between genotypes (Fig. 6D). Additionally, Max load at failure (WT:  $1.48N \pm 0.4$ ; EP4cKO<sup>Scx</sup>:  $0.97N \pm 0.15$ ,  $p=0.17$ )(Fig. 6E), and Stiffness ( $p=0.75$ )(Fig. 6F) were not altered by conditional deletion of *EP4* in *Scx*-lineage cells.

4  
5 *α-SMA myofibroblasts are increased in EP4cKO<sup>S100a4</sup> repairs during later healing*

6 Given that adhesion formation increases during later healing in EP4cKO<sup>S100a4</sup> repairs we examined  
7 changes in pro-fibrotic, matrix producing myofibroblasts (13) as a potential mechanism of increased scar  
8 formation.  $\alpha$ -SMA expressing cells were observed in both the native tendon and scar tissue of WT repairs at day  
9 21; however, a dramatic increase in  $\alpha$ -SMA<sup>+</sup> cells was observed in EP4cKO<sup>S100a4</sup> repairs at this time (Fig. 7A).  
10 In addition, abundant co-localization of  $\alpha$ -SMA and EP4 were observed in EP4cKO<sup>S100a4</sup> repairs at day 21  
11 (yellow arrows, Fig. 7B), particularly in the scar tissue. In contrast, very few double positive ( $\alpha$ -SMA<sup>+</sup>, EP4<sup>+</sup>)  
12 cells were observed in WT repairs, consistent with a decrease in EP4 expression at this time-point relative to  
13 EP4cKO<sup>S100a4</sup>.

## 14 15 **Discussion**

16 In the present study we have examined the effects of deleting the PGE2 receptor, *EP4*, specifically in  
17 *S100a4*-lineage cells during flexor tendon healing. Given the strong association between inflammation and scar  
18 tissue formation (14), we tested the hypothesis that loss of *EP4* in *S100a4*-lineage cells would decrease  
19 adhesion formation and improve tendon gliding function. Our data demonstrate that EP4cKO<sup>S100a4</sup> improves  
20 tendon gliding at 14 days post-surgery, consistent with a significant decrease in *EP4* expression prior to this  
21 point. Conversely, gliding function during the later stages of healing (day 28) is impaired, while *EP4*  
22 expression is similarly increased prior to these functional deficits. Taken together, these data suggests that early  
23 deletion of *EP4* in *S100a4*-lineage cells alters the kinetics of healing, potentially resulting in changes in the  
24 cellular milieu, and up-regulation of *EP4* by an alternative cell population during later healing. To determine  
25 the effects of *EP4* deletion in a different cell population, we examined healing in mice with *EP4* deletion in  
26 *Scleraxis*-lineage cells and found no effect on gliding function or mechanical properties. We then examined  $\alpha$ -  
27 SMA<sup>+</sup> myofibroblasts as potential cell mediator of increased *EP4* expression and adhesion formation during late  
28 healing in EP4cKO<sup>S100a4</sup> mice. A substantial increase in both  $\alpha$ -SMA<sup>+</sup> cells and  $\alpha$ -SMA<sup>+</sup>, EP4<sup>+</sup> double-positive

cells were observed in EP4cKO<sup>S100a4</sup>, suggesting that an influx of  $\alpha$ -SMA+ myofibroblasts may drive up-regulation of EP4, potentially re-activating inflammation and promoting scar-mediated tendon healing.

Immediately following tendon injury the acute inflammatory phase begins. While inflammation is necessary for the initiation and progression of the normal healing cascade, there is clear evidence that inflammation can also drive the scar tissue healing response in tendon. Embryonic (15, 16) and early post-natal (13) healing are characterized by scarless, regenerative healing in contrast to healing in mature tissues which tend toward a scar tissue response. Changes in the inflammatory and immune environment have been proposed as a main factor in this differential response as the embryonic and early post-natal environment has an altered immune system, relative to adult (17, 18). Furthermore, MRL/MPJ mice, which have a blunted inflammatory response (19), also demonstrate improved tendon healing (20). Therefore, modulating inflammation represents a promising approach to improve tendon healing. Cox-2 inhibitors have shown promising inhibition of adhesion formation (2, 3), however systemic Cox-2 inhibitors are plagued by side-effects, including increased risk of adverse cardiovascular events, that must be given serious consideration (21, 22). Thus, we have focused on downstream targets of Cox-2 mediated inflammation, specifically EP4. We have previously demonstrated that systemic antagonism of EP4 impaired gliding function during tendon healing. However, several studies have demonstrated the differential effects of EP4 in a cell-type dependent context. Yokoyama *et al.*, demonstrated that pharmacological antagonism of EP4, or genetic knock-down of EP4 decreased abdominal aortic aneurysms (23). However, Tang *et al.*, demonstrate that bone marrow cell-specific deletion of EP4 promotes abdominal aortic aneurysms (12). Taken together these data support investigating cell-type specific effects of EP4 deletion on tendon healing.

The differential effects of systemic versus cell-type specific EP4 inhibition are demonstrated by alterations in ECM gene expression. EP4 antagonist treatment resulted in earlier expression of *Col3a1*, relative to vehicle treated repairs {Geary 2015}, suggesting that systemic EP4 antagonism promotes an accelerated shift toward scar-mediated healing. In contrast, *Col3a1* was significantly decreased in EP4cKO<sup>S100a4</sup>, relative to WT,



15 consistent with improved gliding in EP4cKO<sup>S100a4</sup> repairs at that time-point. However, expression of *Colla1*,  
16 which is associated with restoration of native tendon composition, is also decreased in EP4cKO<sup>S100a4</sup> repairs  
17 throughout healing, suggesting that EP4cKO<sup>S100a4</sup> disrupts the normal progression of tendon healing. Based on  
18 gliding function, mechanics and gene expression data, WT repairs progress through the normal phases of  
19 healing, with progressive acquisition of mechanical properties, a transient decrease in gliding function, and a  
20 shift from early *Col3a1* expression to *Colla1*. In contrast, no change in gliding function is observed over the  
21 course of healing in EP4cKO<sup>S100a4</sup>, and diminished acquisition of mechanical properties occurs; max load at  
22 failure increases 102% in WT repairs from day 21 to day 28, compared to a 1.6% increase in max load over the  
23 same time-period in EP4cKO<sup>S100a4</sup> repairs. Indeed, following an early failure to form adhesions, EP4cKO<sup>S100a4</sup>  
24 repairs seem to remain relatively static, as no change in GR or MTP Flexion angle is observed over time, and no  
25 up-regulation of *Col3a1* or *Colla1* is observed. Taken together, these data may suggest that early deletion of  
26 *EP4* in S100a4-lineage cells halts progression through the normal phases of tendon healing.

27  
28 Given the differences in healing between EP4 antagonist treated mice, and EP4cKO<sup>S100a4</sup> mice, we  
29 examined the effects of EP4 conditional deletion in *Scleraxis*-lineage cells. *Scleraxis* is required for normal  
30 tendon formation (24), and is expressed by resident tenocytes in mature tendon (13). Recently, *Scx*-lineage  
31 cells have been shown to participate in regenerative tendon healing in neonates, with minimal involvement of  
32 *Scx*<sup>+</sup> cells in mature, scar mediated healing (13), which may account for the lack of phenotype observed in  
33 EP4cKO<sup>Scx</sup>. Furthermore, while *Scx*-lineage cells are observed in the healing tendon (Figure 6), we have used a  
34 non-inducible *Scx*-Cre, so it is unknown if these *Scx*-lineage<sup>+</sup> cells are residual cells from development, or  
35 newly activated *Scx*-expressing cells that are involved in healing.

36 Myofibroblasts are believed to be the cellular drivers of fibrotic tendon healing and peritendinous  
37 adhesions (25, 26), given their ability to produce abundant collagenous ECM. We have used  $\alpha$ -SMA expression  
38 to identify myofibroblasts, consistent with many other studies (27-29). However,  $\alpha$ -SMA has also been used to  
39 mark mesenchymal progenitors (30). While future studies will clarify the lineage, fate and function of these

cells during tendon healing, there is a consistent demonstration of the involvement of  $\alpha$ -SMA<sup>+</sup> cells during tendon healing.

While these data clearly identify different cell-type specific functions of EP4 in tendon healing there are several limitations that must be considered. We have examined the effects of EP4cKO<sup>Scx</sup> at only one time-point during healing, however, if EP4cKO<sup>Scx</sup> were to alter healing, our previous data would suggest these effects would occur prior to day 14 based on the expression profile of *Scx* in this healing model (31). We have also not examined the long-term mechanical effects of EP4cKO<sup>S100a4</sup> on tendon healing. Finally, while these data suggest a role for  $\alpha$ -SMA<sup>+</sup> cell-mediated EP4 induction, and increased scar formation, conditional deletion studies of EP4 using an  $\alpha$ -SMA-Cre mouse would be required to definitively identify the role of *EP4* in  $\alpha$ -SMA-lineage cells.

Together with our previous studies using an EP4 systemic antagonist, these data demonstrate cell-type specific functions of EP4 in scar-mediated tendon healing. Our data suggest that deletion of EP4 in *S100a4*-lineage cells inhibits range of motion-limiting scar tissue without further compromising mechanical properties. However, these beneficial effects of EP4cKO<sup>S100a4</sup> are transient, with aberrant up-regulation of EP4 during later healing, mediated at least in part by  $\alpha$ -SMA<sup>+</sup> cells, and a subsequent decrease in range of motion. These data suggest that sustained inhibition of EP4 in *S100a4*-lineage cells, and  $\alpha$ -SMA-lineage cells may result in prolonged improvements in tendon healing. Furthermore, understanding the mechanisms through which EP4 promotes scar-mediated healing with identify novel therapeutic targets to improve tendon healing.

## Methods

**Animal Ethics:** This study was carried out in strict accordance with the recommendations in the Guide for the Care and Use of Laboratory Animals of the National Institutes of Health. All animal procedures were approved by the University Committee on Animal Research (UCAR) at the University of Rochester (UCAR Number: 2014-004).

16  
17 *Mice*: The following strains were obtained from Jackson Laboratories (Bar Harbor, ME):  $EP4^{flox/flox}$  (#28102),  
18  $ROSA^{nT/nG}$  (# 23035)  $s100a4$ -Cre (#12641). The  $s100a4$ -Cre (32) mice were generated on a BALB/cByJ  
19 background and were back-crossed to C56Bl/6J for at least 10 generations prior to crossing to  $EP4^{flox/flox}$  or  
20  $ROSA^{nT/nG}$  strains.  $Scx$ -Cre mice were generously provided by Dr. Ronen Schweitzer. Conditional knock-out  
21 animals were generated as homozygotes ( $Cre^+$ ;  $EP4^{flox/flox}$ ),  $Cre^-$ ;  $EP4^{flox/flox}$  littermates were used as wildtype  
22 (WT) controls. The  $ROSA^{nT/nG}$  construct is a dual reporter in which all cells express nuclear Tomato red (nT)  
23 fluorescence in the absence of Cre-mediated recombination, and nuclear GFP (nG) upon Cre-mediated  
24 recombination.

25  
26 *Flexor Tendon Surgery*: At 10-12 weeks of age mice underwent complete transection and repair of the flexor  
27 digitorum longus (FDL) tendon in the right hind-paw as previously described (31, 33). Briefly, mice were  
28 anesthetized with Ketamine (60mg/kg) and Xylazine (4mg/kg). A pre-surgical dose of Buprenorphine  
29 (0.05mg/kg) was administered followed by further analgesia every 12-hours after surgery as needed. Following  
30 preparation of the surgical site, the FDL was released at the myotendinous junction in the calf to protect the  
31 repair site from high strains. The skin was closed with a single 5-0 suture. A 1-2cm incision was then made on  
32 the posterior surface of the hindpaw, soft tissue was retracted to identify the FDL, and the FDL was completely  
33 transected using micro-scissors. Following transection the FDL was repaired using 8-0 nylon sutures (Ethicon,  
34 Somerville, NJ) in a modified Kessler pattern. The skin was closed with 5-0 suture. The animals were allowed  
35 unrestricted weight-bearing and movement, and had *ad-libitum* access to food and water.

36  
37 *RNA extraction and qPCR*: Total RNA was extracted from healing tendons between 3-28 days post-surgery.  
38 RNA was extracted from the repair site and 1-2mm of native tendon on both sides of the repair. RNA was  
39 extracted from 3 repairs per genotype per time-point. RNA was extracted using TRIzol reagent (Life  
40 Technologies). 500ng of RNA was used for reverse transcription of cDNA using iScript cDNA synthesis kit  
41 (Bio-Rad, Hercules, CA). Quantitative PCR (qPCR) was then run using cDNA and gene specific primers

(Table 1). Expression was normalized to expression in day 3 WT repairs, and the internal control  $\beta$ -actin. All qPCR was run in triplicate and repeated at least twice.

*Histology- Frozen Sectioning:* Following sacrifice the hind limbs of *s100a4-Cre<sup>+</sup>*; *ROSA<sup>nT/nG</sup>* and *Scx-Cre*; *ROSA<sup>nT/nG</sup>* were removed at the mid-tibia, and skin and excess soft tissue was removed. The skin on the sole of the foot remained intact so as not to disturb the repair site. Tissues were fixed in 10% neutral buffered formalin for 24 hrs at 4°C, decalcified in 14% EDTA (pH 7.2-7.4) for 4 days at 4°C, and processed in 30% sucrose (in PBS) for 24 hours prior to embedding in Cryomatrix (ThermoFisher, Waltham, MA). Eight-micron serial sagittal sections were cut using a cryotape-transfer method (34). Sections were affixed to glass slides using 1% chitosan in 0.25% acetic acid and dried overnight at 4°C. Slides were imaged on a VS120 Virtual Slide Microscope (Olympus, Waltham, MA). Images are representative of at least three specimens per time-point.

*Histology- Paraffin sectioning:* Hind limbs were removed as above and fixed for 72hrs in 10% NBF at room temperature. Specimens were then decalcified for 14 days in 14% EDTA (pH 7.2-7.4), processed and embedded in paraffin. Three-micron serial sagittal sections were cut, de-waxed, rehydrated, and stained with Alcian Blue/ Hematoxylin/ Orange G (ABHOG). Slides were imaged on a VS120 Virtual Slide Microscope (Olympus, Waltham, MA). A total of 3-4 specimens per genotype per time-point were assessed histologically.

*Immunofluorescence:* Paraffin sections were dewaxed, rehydrated and probed with antibodies for EP4 (1:100, #sc-16022, Santa Cruz Biotechnology, Dallas, TX) and  $\alpha$ -SMA-Cy3 (1:200, #C6198, Sigma, St. Louis, MO) overnight at 4°C. An AlexaFlour 488 secondary antibody was used with EP4 (1:200, #705-546-147, Jackson ImmunoResearch, West Grove, PA). The nuclear counterstain DAPI was used, and fluorescence was imaged with a VS120 Virtual Slide Microscope (Olympus, Waltham, MA).

*Assessment of Gliding Function:* Following sacrifice the hindlimb was removed at the knee, and skin was removed down to the ankle. The FDL was isolated at the myotendinous junction and secured using cyanoacrylate between two pieces of tape as previously described (31, 35). Briefly, the tibia was secured in an

alligator clip and the tendon was incrementally loaded with small weights from 0-19g; digital images were taken at each load. The flexion angle of the metatarsophalangeal (MTP) joint was measured from the digital images. The MTP Flexion angle corresponds to the degrees of flexion upon application of the 19g weight. Uninjured tendons undergo complete flexion of the digits at 19g. Gliding resistance was based on the changes in MTP flexion angle of the range of applied loads with higher gliding resistance indicative of impaired gliding function and adhesion formation. Eight-10 specimens per genotype per time-point were analyzed for gliding function.

*Biomechanical testing:* Following Gliding testing, the tibia was removed at the ankle and the toes and proximal section of the FDL in the tape were secured in opposing ends of a custom grips (31, 35) on an Instron 8841 DynaMight™ axial servohydraulic testing system (Instron Corporation, Norwood, MA). The tendons were tested in tension at a rate of 30mm/minute until failure. Maximum load at failure was automatically logged, while stiffness was calculated at the slope of the linear region of the force-displacement curve. Eight-10 specimens per genotype per time-point underwent mechanical testing.

13 **Table 1: Primer Sequences**

304

| Gene           | Forward Primer (5'-3')         | Reverse Primer (5'-3')         |
|----------------|--------------------------------|--------------------------------|
| <i>Col3a1</i>  | ACG TAG ATG AAT TGG GAT GCA G  | GGG TTG GGG CAG TCT AGT G      |
| <i>Col1a1</i>  | GCT CCT CTT AGG CAC T          | CCA CGT CTC ACC ATT GGG G      |
| <i>Scx</i>     | TGG CCT CCA GCT ACA TTT CT     | TGT CAC GGT CTT TGC TCA AC     |
| <i>α-SMA</i>   | GAG GCA CCA CTG AAC CCT AA     | CAT CTC CAG AGT CCA GCA CA     |
| <i>EP4</i>     | TTC CGC TCG TGG TGC GAG TGT TC | GAG GTG GTG TCT GCT TGG GTC AG |
| <i>β-actin</i> | AGA TGT GGA TCA GCA AGC AG     | GCG CAA GTT AGG TTT TGT CA     |

## Figure Legends

**Figure 1. S100a4-Cre effectively targets tendon.** To demonstrate that S100a4-Cre effectively targets recombination in the tendon we examined healing in the double reporter nT/nG with S100a4-Cre<sup>+</sup> cells expressing GFP, and S100a4-Cre<sup>-</sup> cells expressing Td Tomato Red. S100a4-Cre results in recombination in both the (A) un-injured and (B & C) injured tendon at days 7 (B & B') and 14 (C & C') post-surgery. Tendon tissue is outlined in white, (\*) indicate auto-fluorescent sutures at the repair site. Scale bars (A, B', C') represent 100 microns, and (B & C) 200 microns.

**Figure 2. EP4cKO<sup>S100a4</sup> Does Not Alter Baseline Tendon Gliding Function or Mechanical Properties.** No changes in (A) Max load at failure, (B) MTP Flexion Angle, or (C) Gliding Resistance were observed between un-injured tendons from WT and EP4cKO<sup>S100a4</sup> flexor tendons.

**Figure 3. EP4cKO<sup>S100a4</sup> significantly decreases EP4 expression during early healing.** mRNA was isolated from EP4cKO<sup>S100a4</sup> and WT mice between 7-28 days post-surgery. Relative EP4 expression was significantly decreased in EP4cKO<sup>S100a4</sup> relative to WT at day 7, and was significantly increased on days 14 and 21 post-surgery. Expression was normalized to the internal control *β-actin*. (\*) Indicates p<0.05.

**Figure 4. EP4cKO<sup>S100a4</sup> significantly improves early gliding function without compromising mechanical properties during flexor tendon healing.** (A) MTP Flexion Angle, and (B) Gliding Resistance were measured in WT and EP4cKO<sup>S100a4</sup> flexor tendons between 10-28 days post-surgery. (C) Max load at failure, and (D) Stiffness were assessed between 14-28 days post-surgery. (\*) Indicates p<0.05 between WT and EPcKO<sup>S100a4</sup> at the same time-point.

**Figure 5. EP4cKO<sup>S100a4</sup> Repairs Heal with Decreased Expression of *Colla1* and *Col3a1*.** mRNA was isolated from EP4cKO<sup>S100a4</sup> and WT mice between 7-28 days post-surgery. A significant decrease in both (A)

1 *Coll1*, and (B) *Col3a1* expression was observed at day 14 post-surgery in EP4cKO<sup>S100a4</sup> relative to WT.

2 Expression was normalized to the internal control *β-actin*. (\*) Indicates p<0.05.

3  
4 **Figure 6. EP4cKO<sup>Scx</sup> does not alter tendon healing.** (A & B) Tracing of Scx-lineage cells using Scx-Cre;  
5 nT/nG demonstrates that Scx-lineage cells are present in the un-injured tendon (A), and the healing tendon (B).  
6 Scale bar represents 100 microns. (C-F) Healing tendons from EP4cKO<sup>Scx</sup> and WT mice were harvested at day  
7 14 post-surgery. No changes in (C) MTP Flexion Angle, (D) Gliding Resistance, (E) Max load at failure, (F)  
8 Stiffness were observed between WT and EP4cKO<sup>Scx</sup> repairs.

9  
10 **Figure 7. α-SMA myofibroblasts are increased in EP4cKO<sup>S100a4</sup> repairs during later healing and express**  
11 **EP4.** (A) An increased area of α-SMA<sup>+</sup> cells were observed in EP4cKO<sup>S100a4</sup> repairs, relative to WT on day 21  
12 post-surgery. α-SMA<sup>+</sup> cells are identified by red fluorescent staining, while nuclear stain DAPI is blue. Scale  
13 bars represent 200 microns. (B) Co-immunofluorescence for α-SMA (red) and EP4 (green) demonstrate very  
14 few α-SMA<sup>+</sup>, EP4<sup>+</sup> cells (yellow arrow) in WT repairs at day 21. In contrast, abundant α-SMA<sup>+</sup>, EP4<sup>+</sup> cells  
15 (yellow arrows) are observed in EP4cKO<sup>S100a4</sup> repairs at this time. Scale bars represent 50 microns.

## 16 **Acknowledgements**

17 We would like to thank the Histology, Biochemistry and Molecular Biology (HBMI) and Biomechanics Multi-  
18 modal Tissue Engineering (BMTI) Cores in the Center for Musculoskeletal Research (CMSR) at the University  
19 of Rochester for technical assistance with histology and biomechanical testing, respectively.

20 This work was supported in part by NIH/ NIAMS 1K01AR068386-01 (to AEL). The HBMI and BMTI Cores  
21 were supported in part by NIH/ NIAMS P30 AR069655.

22  
23 Author contributions: Study conception and design: RJO, AEL; Acquisition of data: JEA, KTB; Analysis and  
24 interpretation of data: JEA, KTB, AEL; Drafting of manuscript: JEA, AEL; Revision and approval of  
25 manuscript: JEA, KTB, RJO, AEL.



## References

1. Feldscher SB, Schneider LH. Flexor tenolysis. *Hand Surg.* 2002;7(1):61-74.
2. Virchenko O, Skoglund B, Aspenberg P. Parecoxib impairs early tendon repair but improves later remodeling. *Am J Sports Med.* 2004;32(7):1743-7.
3. Rouhani A, Tabrizi A, Ghavidel E. Effects of non-steroidal anti-inflammatory drugs on flexor tendon rehabilitation after repair. *Arch Bone Jt Surg.* 2013;1(1):28-30.
4. Khan MH, Li Z, Wang JH. Repeated exposure of tendon to prostaglandin-E2 leads to localized tendon degeneration. *Clin J Sport Med.* 2005;15(1):27-33.
5. Koshima H, Kondo S, Mishima S, Choi HR, Shimpo H, Sakai T, et al. Expression of interleukin-1beta, cyclooxygenase-2, and prostaglandin E2 in a rotator cuff tear in rabbits. *J Orthop Res.* 2007;25(1):92-7.
6. Li Z, Yang G, Khan M, Stone D, Woo SL, Wang JH. Inflammatory response of human tendon fibroblasts to cyclic mechanical stretching. *Am J Sports Med.* 2004;32(2):435-40.
7. Wang JH, Li Z, Yang G, Khan M. Repetitively stretched tendon fibroblasts produce inflammatory mediators. *Clin Orthop Relat Res.* 2004(422):243-50.
8. Zhang J, Wang JH. Production of PGE(2) increases in tendons subjected to repetitive mechanical loading and induces differentiation of tendon stem cells into non-tenocytes. *J Orthop Res.* 2010;28(2):198-203.
9. Thampatty BP, Li H, Im HJ, Wang JH. EP4 receptor regulates collagen type-I, MMP-1, and MMP-3 gene expression in human tendon fibroblasts in response to IL-1 beta treatment. *Gene.* 2007;386(1-2):154-61.
10. Geary MB, Orner CA, Bawany F, Awad HA, Hammert WC, O'Keefe RJ, et al. Systemic EP4 Inhibition Increases Adhesion Formation in a Murine Model of Flexor Tendon Repair. *PloS one.* 2015;10(8):e0136351.
11. Yokoyama U, Ishiwata R, Jin MH, Kato Y, Suzuki O, Jin H, et al. Inhibition of EP4 signaling attenuates aortic aneurysm formation. *PloS one.* 2012;7(5):e36724.
12. Tang EH, Shvartz E, Shimizu K, Rocha VZ, Zheng C, Fukuda D, et al. Deletion of EP4 on bone marrow-derived cells enhances inflammation and angiotensin II-induced abdominal aortic aneurysm formation. *Arterioscler Thromb Vasc Biol.* 2011;31(2):261-9.
13. Howell K, Chien C, Bell R, Laudier D, Tufa SF, Keene DR, et al. Novel Model of Tendon Regeneration Reveals Distinct Cell Mechanisms Underlying Regenerative and Fibrotic Tendon Healing. *Sci Rep.* 2017;7:45238.
14. Galatz LM, Gerstenfeld L, Heber-Katz E, Rodeo SA. Tendon regeneration and scar formation: The concept of scarless healing. *J Orthop Res.* 2015;33(6):823-31.
15. Beredjikian PK, Favata M, Cartmell JS, Flanagan CL, Crombleholme TM, Soslowky LJ. Regenerative versus reparative healing in tendon: a study of biomechanical and histological properties in fetal sheep. *Annals of biomedical engineering.* 2003;31(10):1143-52.
16. Favata M, Beredjikian PK, Zgonis MH, Beason DP, Crombleholme TM, Jawad AF, et al. Regenerative properties of fetal sheep tendon are not adversely affected by transplantation into an adult environment. *J Orthop Res.* 2006;24(11):2124-32.
17. Sattler S, Rosenthal N. The neonate versus adult mammalian immune system in cardiac repair and regeneration. *Biochim Biophys Acta.* 2016;1863(7 Pt B):1813-21.
18. Simon AK, Hollander GA, McMichael A. Evolution of the immune system in humans from infancy to old age. *Proc Biol Sci.* 2015;282(1821):20143085.
19. Ueno M, Lyons BL, Burzenski LM, Gott B, Shaffer DJ, Roopenian DC, et al. Accelerated wound healing of alkali-burned corneas in MRL mice is associated with a reduced inflammatory signature. *Invest Ophthalmol Vis Sci.* 2005;46(11):4097-106.
20. Lalley AL, Dymont NA, Kazemi N, Kenter K, Gooch C, Rowe DW, et al. Improved biomechanical and biological outcomes in the MRL/MpJ murine strain following a full-length patellar tendon injury. *J Orthop Res.* 2015;33(11):1693-703.

- 16 21. Olsen AM, Fosbol EL, Lindhardsen J, Folke F, Charlot M, Selmer C, et al. Long-term cardiovascular  
17 risk of nonsteroidal anti-inflammatory drug use according to time passed after first-time myocardial  
18 infarction: a nationwide cohort study. *Circulation*. 2012;126(16):1955-63.
- 19 22. Antman EM, Bennett JS, Daugherty A, Furberg C, Roberts H, Taubert KA, et al. Use of nonsteroidal  
20 antiinflammatory drugs: an update for clinicians: a scientific statement from the American Heart  
21 Association. *Circulation*. 2007;115(12):1634-42.
- 22 23. Aoki N, Yokoyama R, Asai N, Ohki M, Ohki Y, Kusubata K, et al. Adipocyte-derived microvesicles are  
23 associated with multiple angiogenic factors and induce angiogenesis in vivo and in vitro. *Endocrinology*.  
24 2010;151(6):2567-76.
- 25 24. Murchison ND, Price BA, Conner DA, Keene DR, Olson EN, Tabin CJ, et al. Regulation of tendon  
26 differentiation by scleraxis distinguishes force-transmitting tendons from muscle-anchoring tendons.  
27 *Development*. 2007.
- 28 25. Kvist M, Jozsa L, Jarvinen M, Kvist H. Fine structural alterations in chronic Achilles paratenonitis in  
29 athletes. *Pathol Res Pract*. 1985;180(4):416-23.
- 30 26. Jarvinen M, Jozsa L, Kannus P, Jarvinen TL, Kvist M, Leadbetter W. Histopathological findings in  
31 chronic tendon disorders. *Scand J Med Sci Sports*. 1997;7(2):86-95.
- 32 27. Li B, Wang JH. Fibroblasts and myofibroblasts in wound healing: force generation and  
33 measurement. *J Tissue Viability*. 2011;20(4):108-20.
- 34 28. Hinz B, Gabbiani G, Chaponnier C. The NH2-terminal peptide of alpha-smooth muscle actin inhibits  
35 force generation by the myofibroblast in vitro and in vivo. *J Cell Biol*. 2002;157(4):657-63.
- 36 29. Cadby JA, Buehler E, Godbout C, van Weeren PR, Snedeker JG. Differences between the cell  
37 populations from the peritenon and the tendon core with regard to their potential implication in tendon  
38 repair. *PloS one*. 2014;9(3):e92474.
- 39 30. Dymment NA, Hagiwara Y, Matthews BG, Li Y, Kalajzic I, Rowe DW. Lineage tracing of resident  
40 tendon progenitor cells during growth and natural healing. *PloS one*. 2014;9(4):e96113.
- 41 31. Loisel AE, Bragdon GA, Jacobson JA, Hasslund S, Cortes ZE, Schwarz EM, et al. Remodeling of  
42 murine intrasynovial tendon adhesions following injury: MMP and neotendon gene expression. *J Orthop  
43 Res*. 2009;27(6):833-40.
- 44 32. Bhowmick NA, Chytil A, Plieth D, Gorska AE, Dumont N, Shappell S, et al. TGF-beta signaling in  
45 fibroblasts modulates the oncogenic potential of adjacent epithelia. *Science*. 2004;303(5659):848-51.
- 46 33. Ackerman JE, Loisel AE. Murine Flexor Tendon Injury and Repair Surgery. *J Vis Exp*. 2016(115).
- 47 34. Dymment NA, Jiang X, Chen L, Hong SH, Adams DJ, Ackert-Bicknell C, et al. High-Throughput, Multi-  
48 Image Cryohistology of Mineralized Tissues. *J Vis Exp*. 2016(115).
- 49 35. Hasslund S, Jacobson JA, Dadali T, Basile P, Ulrich-Vinther M, Soballe K, et al. Adhesions in a  
50 murine flexor tendon graft model: Autograft versus allograft reconstruction. *J Orthop Res*.  
51 2008;26(6):824-33.  
52

# S100a4-Cre<sup>+</sup>; nT/nG

## Un-injured

## Day 7 Post-Surgery

## Day 14 Post-Surgery

S100a4<sup>-</sup>  
S100a4<sup>+</sup>

S100a4<sup>-</sup>  
S100a4<sup>+</sup>

S100a4<sup>-</sup>  
S100a4<sup>+</sup>

Tendon

Muscle

Muscle

A

100µm

Tendon

Tendon

B

200µm

B'

100µm

Tendon

Tendon

C

200µm

C'

100µm

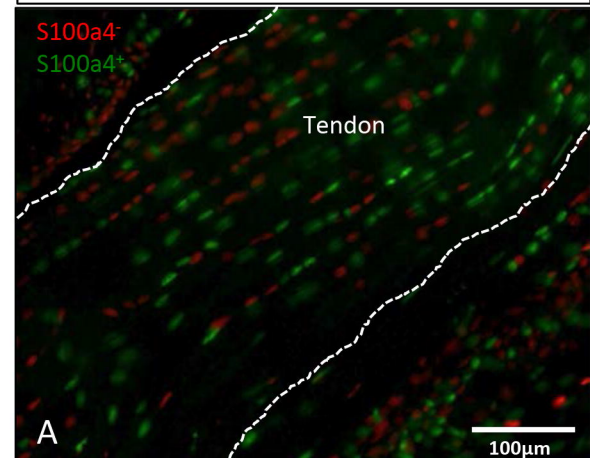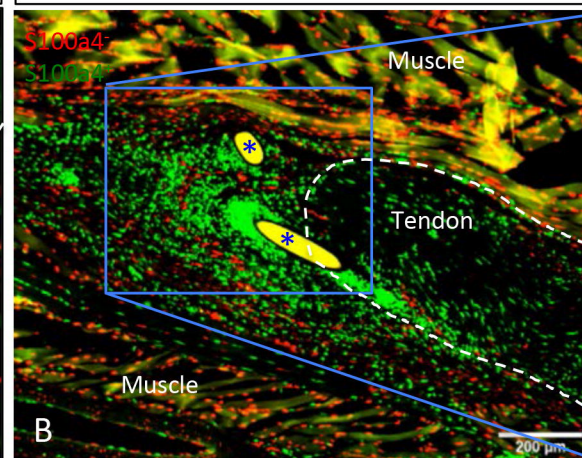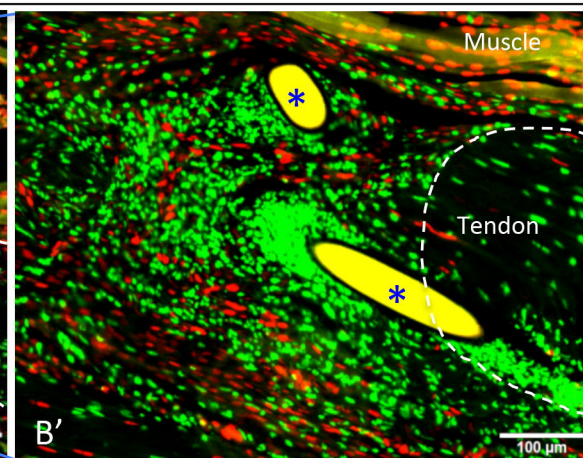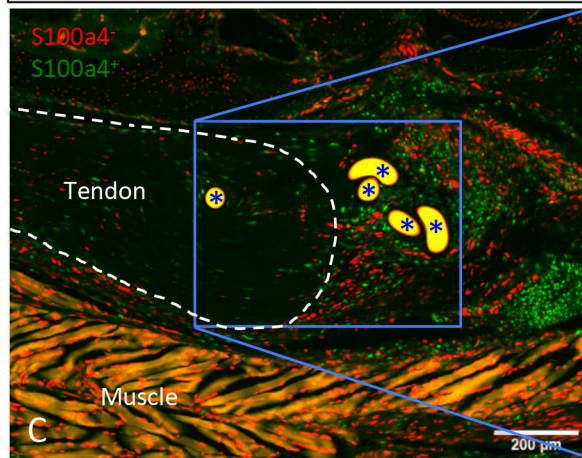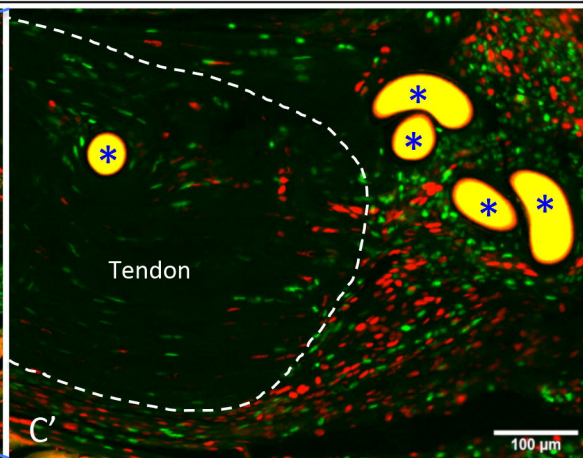

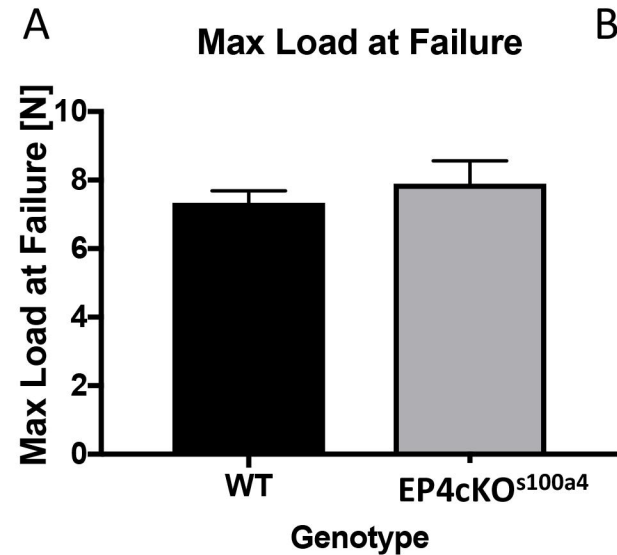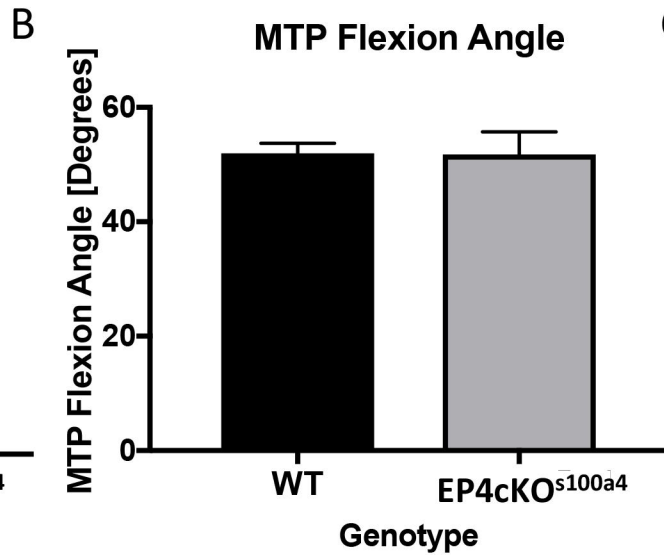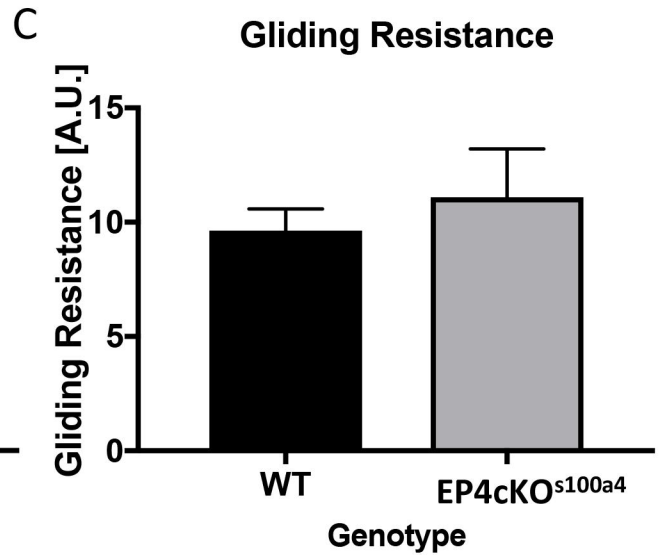

# *EP4*

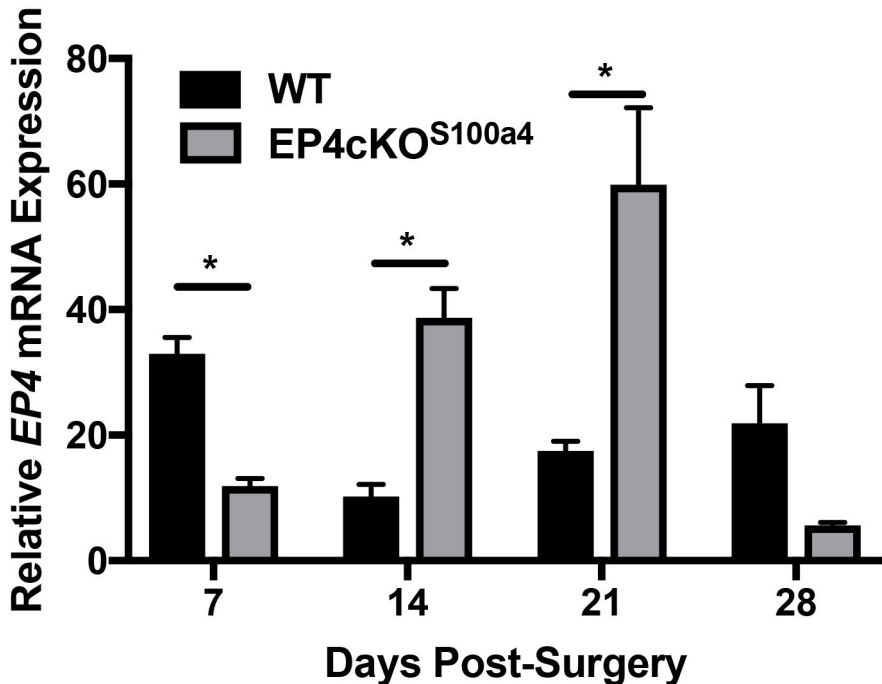

### MTP Flexion Angle

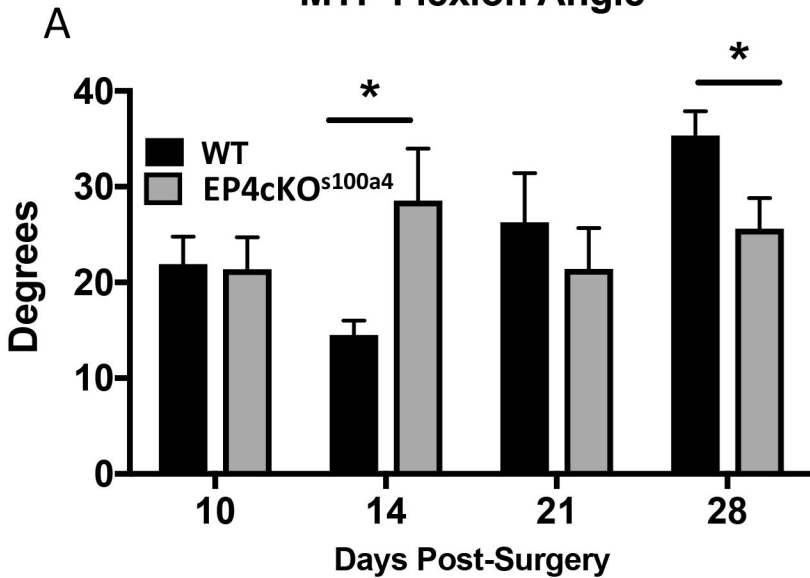

### Gliding Resistance

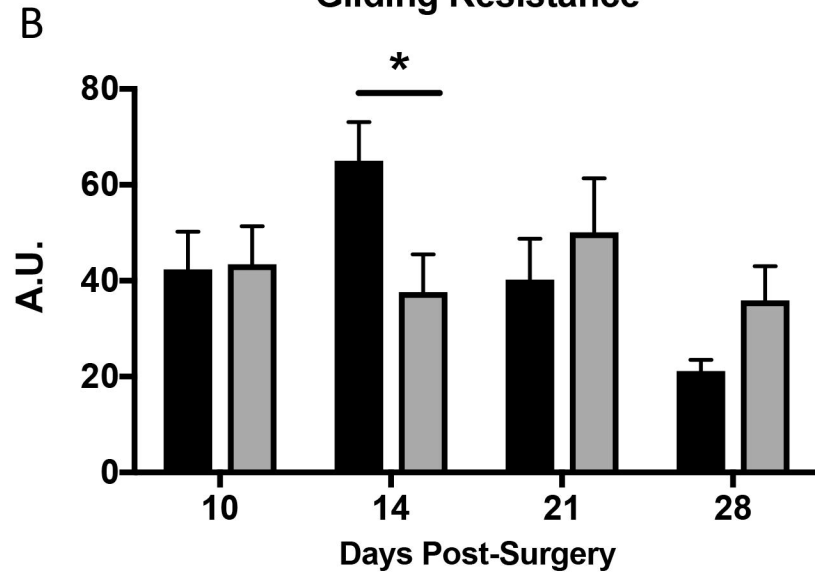

### Max Load at Failure

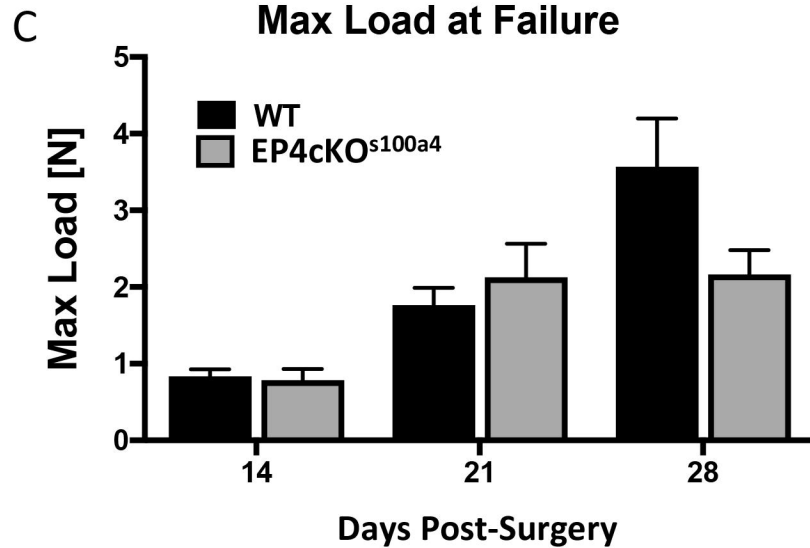

### Stiffness

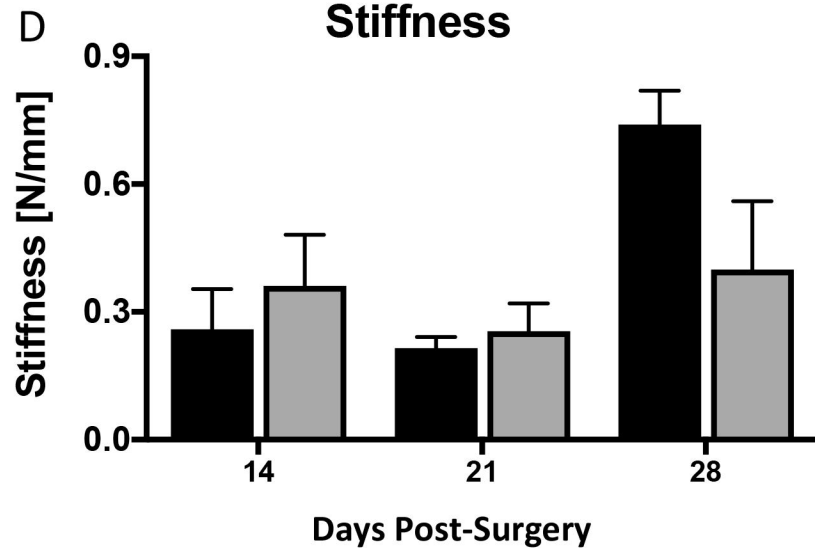

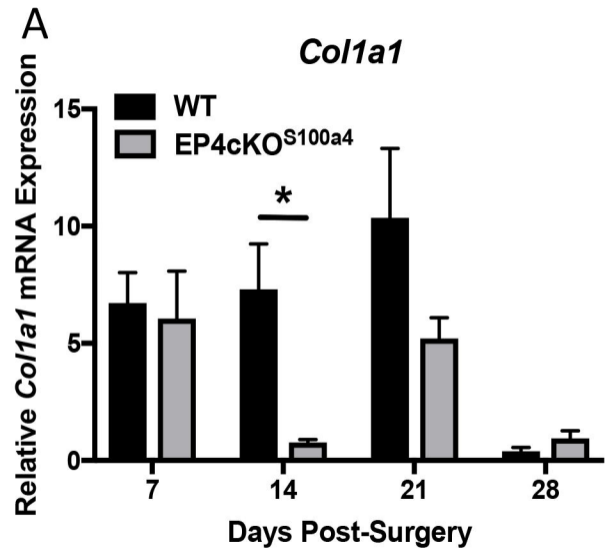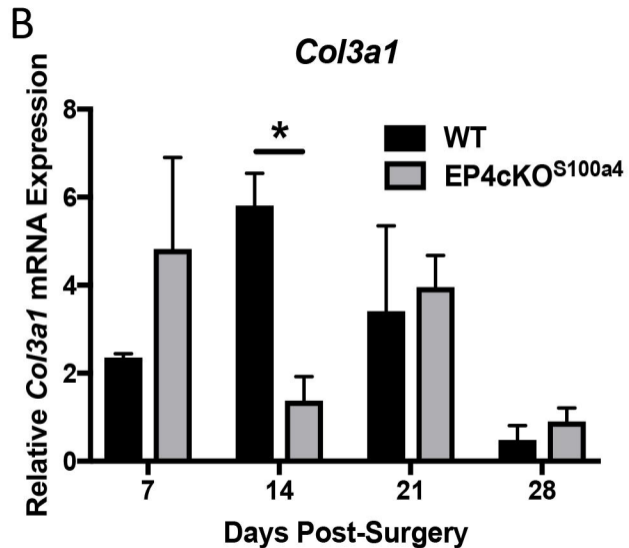

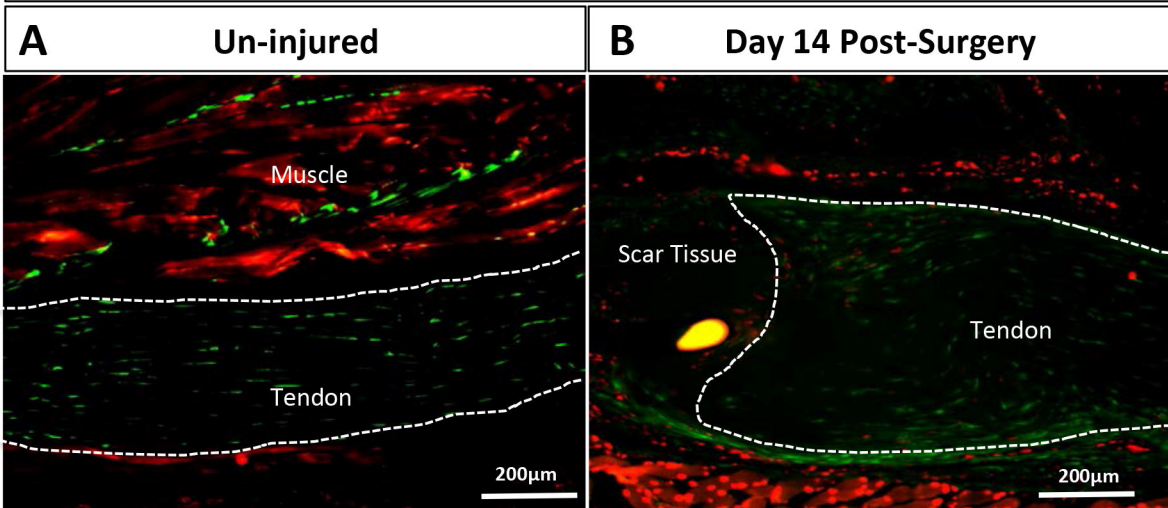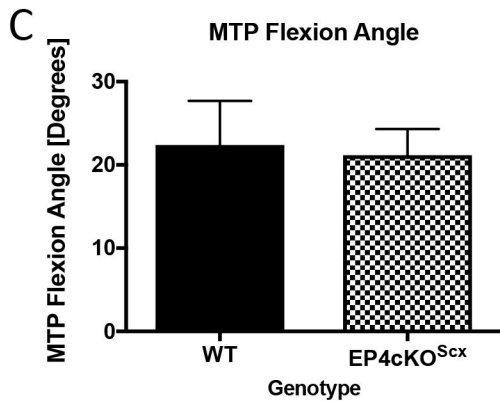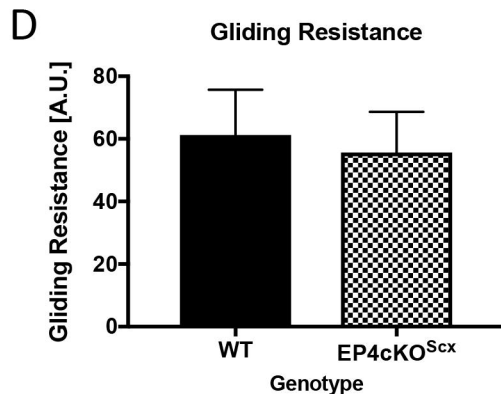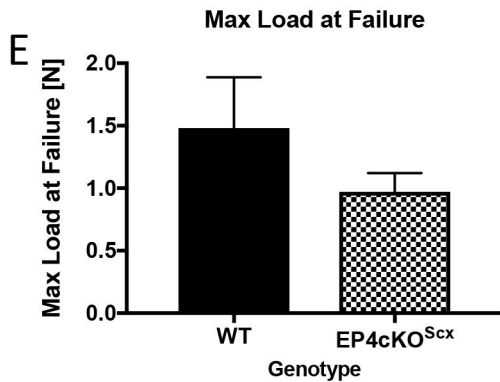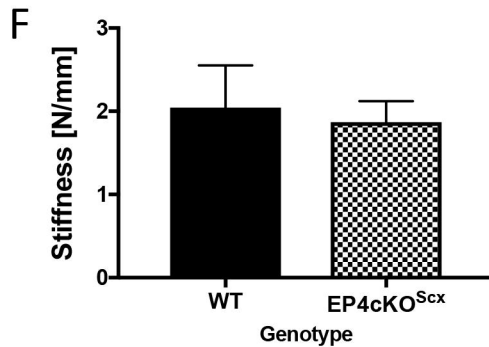



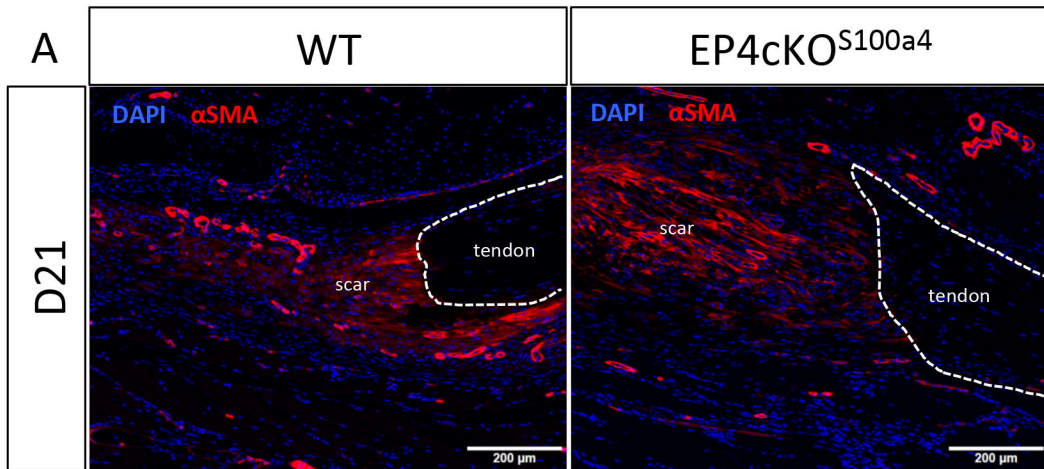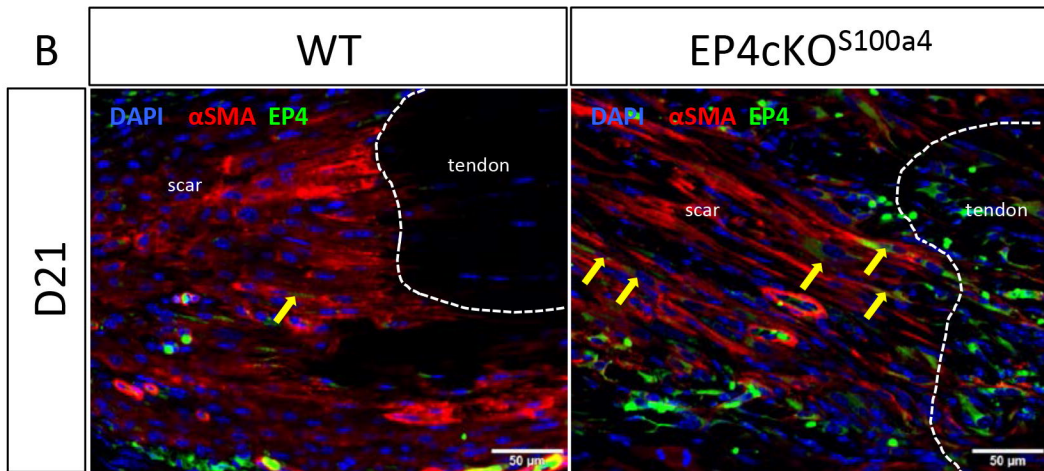

Source: http://biorxiv.org/content/10.1101/132860v1.full.pdf
